# Supplementary material for: A covalent organic polymer as an efficient chemosensor for highly selective H2S detection through proton conduction
Source: Royal Society of Chemistry journal article supplement (doi:10.1039/d0cc02704a), 2020-01-01
Supplement: d0cc02704a1.pdf [file d0cc02704a1.pdf]

Supporting information

Covalent organic polymer as an efficient chemosensor for highly selective H<sub>2</sub>S detection through proton conduction

## Table of contents

| S. No             | Contents                                                                                                                        | Page No |
|-------------------|---------------------------------------------------------------------------------------------------------------------------------|---------|
| <b>Section 1</b>  | Materials                                                                                                                       | S3      |
| <b>Section 2</b>  | Synthetic procedure of <b>COP</b>                                                                                               | S3      |
| <b>Section 3</b>  | Material characterization                                                                                                       | S3      |
| <b>Section 4</b>  | Gas sensor fabrication and sensing measurements                                                                                 | S3-S4   |
| <b>Section 5</b>  | FT-IR stretching frequencies of benzene-1,3,5-tricarboxaldehyde and 6-Hydrazinonicotinic hydrazide                              | S4      |
| <b>Figure S1</b>  | Wide angle powder XRD of the <b>COP</b> .                                                                                       | S5      |
| <b>Figure S2</b>  | Thermogravimetric analysis of the <b>COP</b> .                                                                                  | S5      |
| <b>Figure S3</b>  | HRTEM image of the <b>COP</b> showing porous texture of the <b>COP</b> .                                                        | S6      |
| <b>Figure S4</b>  | BET surface area analysis by N <sub>2</sub> adsorption and pore size distribution of the <b>COP</b> by using the NLDFT methods. | S6      |
| <b>Table S1</b>   | Summary of BET surface area analysis of the <b>COP</b> .                                                                        | S6      |
| <b>Figure S5</b>  | Resistance of the <b>COP</b> based sensor <i>vs</i> operating temperature.                                                      | S7      |
| <b>Table S2</b>   | Comparison table of H <sub>2</sub> S sensing of the <b>COP</b> with other reported nanomaterials.                               | S7      |
| <b>Section S6</b> | Proposed H <sub>2</sub> S sensing mechanism of <b>COP</b> through proton conduction phenomenon                                  | S8      |
| <b>Scheme S1</b>  | Proposed schematic representation of H <sub>2</sub> S sensing of <b>COP</b> through proton conduction.                          | S8      |
|                   | Supporting References                                                                                                           | S11     |

## **Materials and Methods**

### **Section 1. Materials**

6-Hydrazinonicotinic hydrazide hydrate, benzene-1,3,5-tricarboxaldehyde, acetic acid, dimethyl sulfoxide (DMSO), and all other solvents were purchased from Sigma Aldrich and Merck.

### **Section 2. Synthetic Procedure of COP**

6-Hydrazinonicotinic hydrazide hydrate and benzene-1,3,5-tricarboxaldehyde in ethanol and 6M acetic acid solution were refluxed in 100 mL round bottom flask for 48 h at 90 °C. After that the reaction mixture was filtered and washed with methanol, acetone, dichloromethane, dimethyl sulfoxide and water. The reddish brown solid residue was dried over 80 °C for 24 h. The reddish brown solid **COP** powder was characterized by <sup>13</sup>C solid state NMR and FT-IR spectroscopy.

### **Section 3. Material Characterization**

Solid state <sup>13</sup>C NMR spectrum was recorded using 400 MHz solid state NMR spectrometer (JEOL, model: ECX400; proton frequency: 400 MHz). Powder XRD was done on Rigaku SmartLab, Automated Multipurpose X-ray Diffractometer. Thermogravimetric analysis (TGA) was analyzed using Mettler Toledo Thermal Analyzer with heating rate of 10 °C/min. BET surface area was analyzed on Quantachrome, Autosorb iQ2. FT-IR spectra of the **COP** were recorded using Bruker, Tensor-27 FT-IR spectrophotometer. High resolution transmission electron (HRTEM) microscopy analysis was performed using Field Emission Gun-Transmission Electron Microscope 200 kV (model: Tecnai G2, F30). The field-emission scanning electron microscopy (FESEM) measurements were performed using a field-emission scanning electron microscope (Model: Supra 55 Zeiss). For FESEM measurements, the dried samples were coated with gold for subsequent imaging experiments. Atomic force microscopy (AFM) images were taken by drop-casting the samples on mica substrates *via* tapping mode at a scan frequency of 0.65-1.0 Hz and analyzed the data using SmartScan software (model park NX10).

### **Section 4. Gas Sensor Fabrication and Sensing Measurements**

A Corning glass slide with the dimension of 3 × 3 × 0.5 mm was used for the sensor substrate. Two interdigitated Pt electrodes on the top of glass substrate were used to fabricate the sensor. Each Pt electrode consists of 5 fingers (250 × 25 × 1 μm), and the distance between two fingers was 25 μm. The **COP** powder (10 mg) in 3 mL ethanol in a 10 mL beaker was stirred and sonicated for 30 min. After that dispersed solution of the **COP** was directly drop-casted on the interdigitated electrodes coated glass substrate and dried it for the overnight at 120 °C.

The gas sensing experiment was carried out by the dynamic flow-through measurement technique (Scheme 1). The sensor resistance was monitored by Keithley-2612A source meter interfaced with PC at a direct-current (DC) voltage of 2 V. Optimal concentration of H<sub>2</sub>S in the chamber was gained by flowing a certain amount (sccm) of synthetic air to a mixing chamber where certain amount (sccm) of test gas (H<sub>2</sub>S) was flown. The flow rates of the respective gases were controlled by a separate mass

flow controller, MFC (model: Alicat®, MC 1slpm, USA). The temperature of the system was controlled by a PID temperature controller (with an accuracy of  $\pm 1$  °C). Efficiency of the sensor corresponds to the response% is given by:

$$\text{Response (\%)} = \frac{R_g - R_a}{R_a} \times 100$$

Where  $R_g$  and  $R_a$  are the resistance of the sensor in presence of sensing gas and air.

#### **Section S5. FT-IR stretching frequencies of benzene-1,3,5-tricarboxaldehyde and 6-hydrazinonicotinic hydrazide**

FT-IR spectrum of benzene-1,3,5-tricarboxaldehyde shows a peak at  $1706 \text{ cm}^{-1}$  due to the presence of -C=O stretching mode of -CHO groups. This peak is disappeared in **COP** spectrum due to the formation of Schiff base imine. The disappearance of FT-IR peak at  $1706 \text{ cm}^{-1}$  in **COP** suggests the formation of Schiff base polymer.

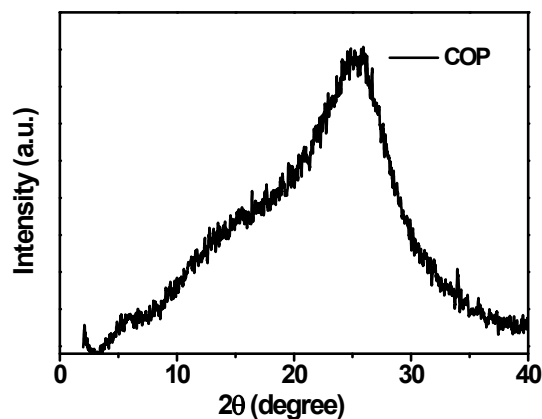

Figure S1. Wide-angle powder XRD of the COP.

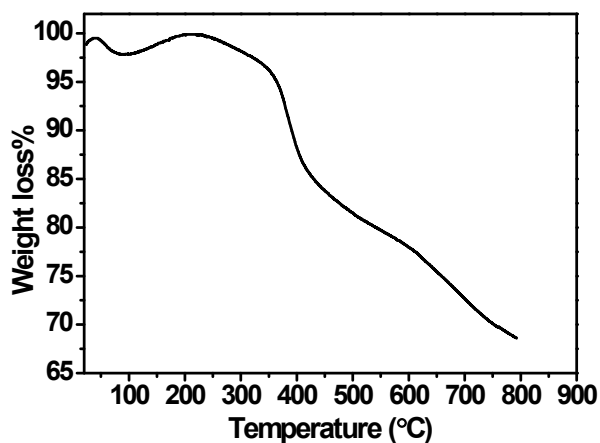

Figure S2. Thermogravimetric analysis of the COP.

**Discussion:** There is a slight increase of the mass within the temperature of 100-200 °C. The slight increment of mass of sample within the temperature ranges is due to the buoyancy effect in TGA equipment. We impend an object in a fluid, the fluid tends to force the object upwards. Before TGA analysis, we put our sample in the analyzer chamber. The fluid (N<sub>2</sub>) tends to force the sample upwards. Now when the analysis begins, the density of the fluid is slightly decreased with increasing the temperature and consequently the hanged sample goes down. Then we recorded these changes as mass increment but they are produced by a small change in the density of the surrounding fluid. This effect becomes less at higher temperature or heating rates.<sup>1-3</sup>

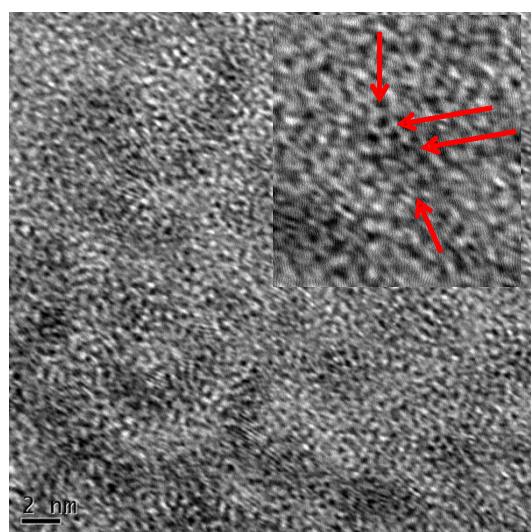

Figure S3. HRTEM image of the COP showing porous texture of the COP.

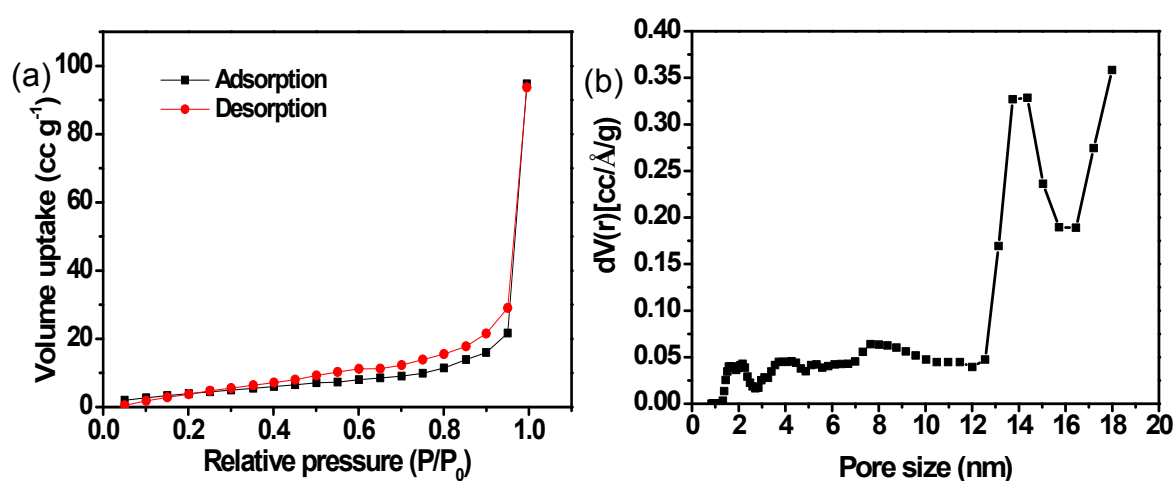

Figure S4. BET surface area analysis by  $N_2$  adsorption and pore size distribution of the COP by using the NLDFT methods.

Table S1. Summary of BET surface area analysis of the COP

| Material   | $N_2$ uptake ( $cc\ g^{-1}$ ) | Langmuir surface area ( $m^2\ g^{-1}$ ) | Pore size (nm) | Pore volume ( $cc\ g^{-1}$ ) |
|------------|-------------------------------|-----------------------------------------|----------------|------------------------------|
| <b>COP</b> | 94.74                         | 452                                     | 17.5           | 0.29                         |

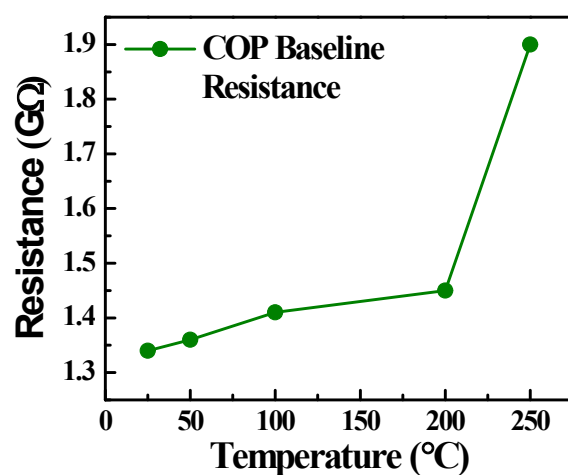

Figure S5. Resistance of the **COP** based sensor vs operating temperature.

Table S2. Comparison table of H<sub>2</sub>S sensing of the **COP** with other reported nanomaterials based chemiresistive sensor

| S. No | Material                                         | Response time | Maximum response%               | Temp. (°C) | Ref.      |
|-------|--------------------------------------------------|---------------|---------------------------------|------------|-----------|
| 1     | Zn-doped-Fe <sub>2</sub> O <sub>3</sub> nanowire | 16 s          | 23.5 (5 ppm H <sub>2</sub> S)   | 175        | 20 c      |
| 2     | Fe <sub>2</sub> O <sub>3</sub> @CNT-3.0          | 30 s          | ~ 9 (100 ppm H <sub>2</sub> S)  | 25 °C      | 20 d      |
| 4     | MoSe <sub>2</sub>                                | 15 s          | 19-20 (5.45 ppm)                | 200 °C     | 20 e      |
| 5     | Au-nanowire                                      | 15 min        | 30-40 (0.5 ppm)                 | 25 °C      | 20 f      |
| 6     | SnO <sub>2</sub> /rGO nanocomposites             | 2-13 s        | 60-70 (100 ppm)                 | 22 °C      | 20 g      |
| 7     | <b>COP</b>                                       | 9 s           | 50-60 (200 ppm), 30-40 (50 ppm) | 25 °C      | This work |

## Section 6. Proposed H<sub>2</sub>S sensing mechanism of COP through proton conduction phenomenon

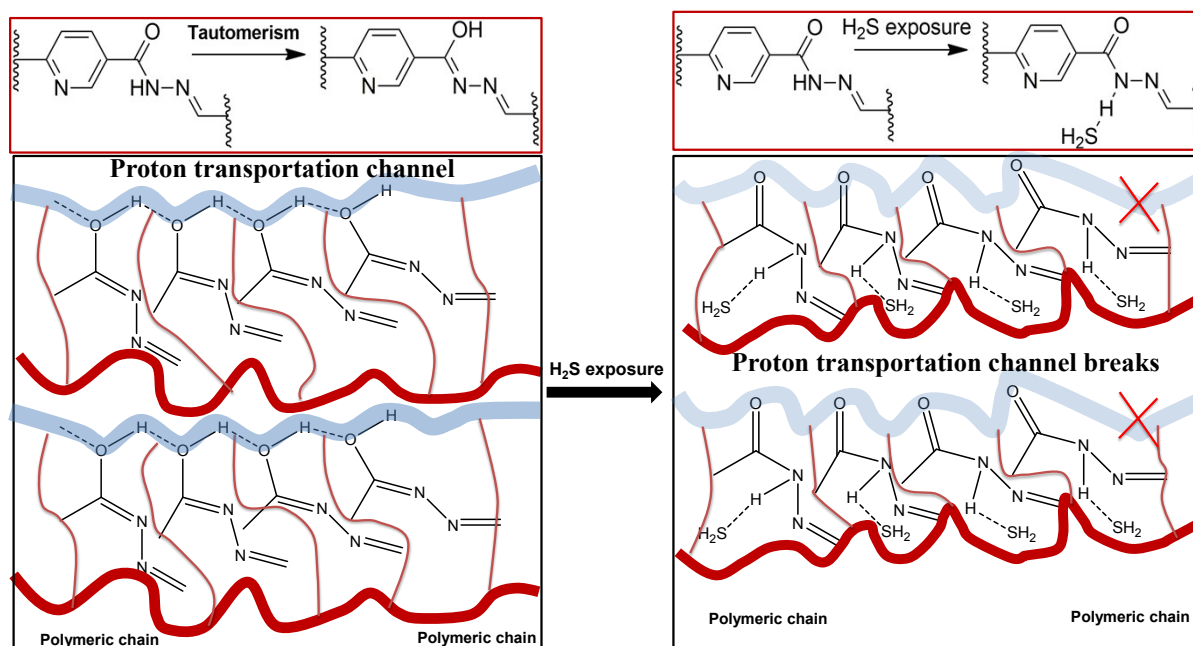

Scheme S1. Proposed schematic representation of H<sub>2</sub>S sensing of COP through proton conduction.

Here, we proposed chemiresistive gas sensing mechanism. The COP creates a proton transportation channel inside the polymeric chain due to proton transfer of the enol form of hydrazide groups ( $-\text{C}(\text{OH})\text{N}=\text{N}=\text{}$ ).<sup>4,7</sup> After H<sub>2</sub>S exposure, the proton transportation channel gradually collapses due to H<sub>2</sub>S $\cdots$ H-N-(C=O) interaction.<sup>8</sup> Obviously, in H<sub>2</sub>S environment the stability or percentage of enol form becomes lower due to H<sub>2</sub>S $\cdots$ H-N-(C=O) interaction. As a result, the electrical resistance of COP increases in presence of H<sub>2</sub>S and we get very fast response. We observed that the response time becomes less at higher ppm of H<sub>2</sub>S and very fast increment of electrical resistance of the system.

Here, the gas sensing mechanism does not occur only through the acid base interaction, however it also depends on the surface area of adsorbant, pore size and rate of adsorption-desorption of the analytes (here gases).

However, we tried to establish this through the theoretical insight. Density functional theory (DFT) calculations have been performed using Gaussian 09 software. First, the geometry of the truncated COP (named COPT) with C(=O)NH-N= functionality has been optimized as C(=O)NH-N= groups which mainly involves the sensing mechanism. Then the calculation is performed with a truncated version of COP, one molecule of H<sub>2</sub>S and CO<sub>2</sub>. The energy of COPT before the interaction with H<sub>2</sub>S and CO<sub>2</sub> is -737.293 Hartree. Now the total energy of the H<sub>2</sub>S-COPT system is lowered (became more negative) value of -1134.694 Hartree than CO<sub>2</sub>-COPT with energy of -924.809 Hartree. From the energy calculation study, we conclude that H<sub>2</sub>S-COPT system is more energetically stable and favourable system than CO<sub>2</sub>-COPT system. So H<sub>2</sub>S should have more tendencies to interact with COP than CO<sub>2</sub>.



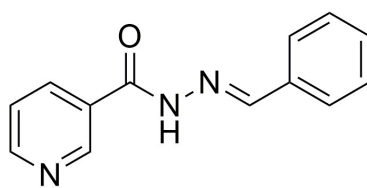

**COPT**

Here, we have calculated the  $pK_a$  value of **COPT** (AH) using DFT calculation.<sup>4</sup> The  $pK_a$  value of **COPT** is calculated as high as 51.072. Now **COPT** behaves almost like an aliphatic hydrocarbons compound due to very high  $pK_a$  value. So acid-base type of interaction with external analytes (acidic gases) is insignificant in here.

Calculation of  $pK_a$  value:

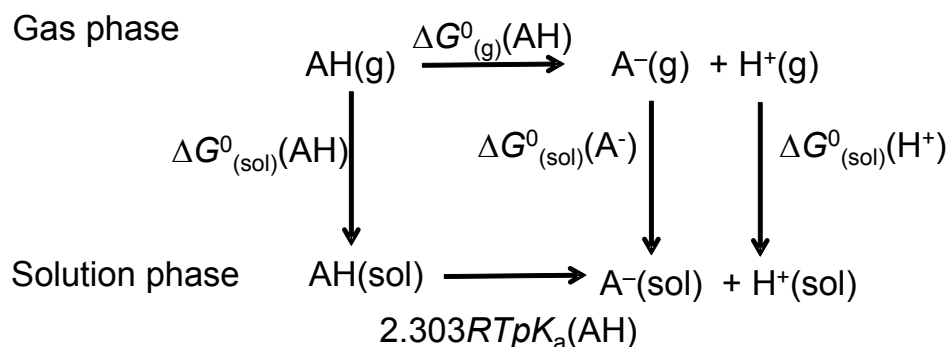

Thermodynamic cycled used for the calculation of  $pK_a$  values.

$$\Delta G^0_{(g)}(\text{AH}) = \Delta G^0_{(\text{sol})}(\text{A}^-) + \Delta G^0_{(\text{sol})}(\text{H}^+) - \Delta G^0_{(\text{sol})}(\text{AH})$$

$$\Delta G^0_{(g)}(\text{AH}) = 2.303 RTpK_a(\text{AH})$$

$$\text{Direct } pK_a(\text{AH}) = \frac{\Delta G^0_{(g)}(\text{AH})}{2.303 RT}$$

$$\text{Linear correction } pK_a = (\text{Direct } pK_a + 7.281)/1.194$$

| System                             | Molecular structure | HOMO               | LUMO               |
|------------------------------------|---------------------|--------------------|--------------------|
| COPT (gas phase)                   |                     | <br>-0.223 Hartree | <br>-0.067 Hartree |
| H <sub>2</sub> S-COPT (gas phase)  |                     | <br>-0.216 Hartree | <br>-0.062 Hartree |
| CO <sub>2</sub> -COPT (gas phase)  |                     | <br>-0.216 Hartree | <br>-0.061 Hartree |
| Deprotonated COPT (solution phase) |                     | <br>-0.112 Hartree | <br>-0.045 Hartree |
| COPT (solution phase)              |                     | <br>-0.224 Hartree | <br>-0.069 Hartree |
| Deprotonated COPT (gas phase)      |                     | <br>-0.021 Hartree | <br>-0.074 Hartree |

Summary of all DFT calculations (Basis set = 3-21G, Basis function = B3LYP, Solvation = The conductor-like polarizable continuum model CPCM/water)).

Now, if we include the effect of moisture, H<sub>2</sub>S (weak acid) generates HS<sup>-</sup> and S<sup>2-</sup> after reaction with moisture whereas CO<sub>2</sub> forms H<sub>2</sub>CO<sub>3</sub> (weak acid) upon reaction with moisture.

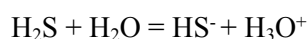

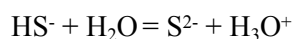

Now  $\text{HS}^-$  will more prone to interact with  $-\text{HN}-\text{C}(=\text{O})$  rather than  $\text{H}_2\text{CO}_3$ . After exposure with  $\text{H}_2\text{S}$ , the proton transportation channel gradually collapses due to  $\text{H}_2\text{S}\cdots\text{H}-\text{N}-\text{C}(=\text{O})$  interaction. In  $\text{H}_2\text{S}$  environment, the stability or percentage of enol form becomes lower due to  $\text{H}_2\text{S}\cdots\text{H}-\text{N}-\text{C}(=\text{O})$  interaction. As a result, the electrical resistance of **COP** increases or suddenly changes in presence of  $\text{H}_2\text{S}$  and very fast response was observed for  $\text{H}_2\text{S}$ .

### Supporting References

- 1) P. Gabbott, Principles and applications of thermal analysis. (Ed.), (2008), UK, John Wiley & Sons.
- 2) J. D. Menczel and R. B. Prime, Thermal analysis of polymers: fundamentals and applications. (Eds.). (2014), UK, John Wiley & Sons.
- 3) S. K. Das, P. Bhanja, S. K. Kundu, S. Mondal and A. Bhaumik, *ACS Appl. Mater. Interfaces* 2018, **10**, 28, 23813-23824.
- 4) V. Oklejas, R. H. Uibel, R. Horton and J. M. Harris, *Anal. Chem.* 2008, **80**, 1891-1901.
- 5) M. Mohan, M. N. Satyanarayan and D. R. Trivedi, *New J. Chem.* 2019, **43**, 10413-10428.
- 6) S. Mondal, S.; Y. Agam, R. Nandi and N. Amdursky, *Chem. Sci.* 2020, **11**, 3547-3556.
- 7) S. Rani, M. Kumar, R. Garg, S. Sharma and D. Kumar, *IEEE Sens. J.*, 2016, **16**, 2929 - 2934.
- 8) M. K. Krepps, S. Parkin and D. A. Atwood, *Crystal Growth & Design* 2001, **1**, 291-297.
- 9) C. P. Kelly, C. J. Cramer and D. J. Truhla, *J. Phys. Chem. B* 2007, **111**, 408-422.
